# Supplementary material for: MOF-derived microstructural interconnected network porous Mn2O3/C as negative electrode material for asymmetric supercapacitor device
Source: Royal Society of Chemistry journal article supplement (doi:10.1039/c8ce01683f), 2019-01-01
Supplement: c8ce01683f1.pdf [file c8ce01683f1.pdf]

## SUPPLEMENTARY INFORMATION

### ***MOF-Derived Micro Structural Interconnected Network Porous Mn<sub>2</sub>O<sub>3</sub>/C as the Negative Electrode Material for Asymmetric Supercapacitor Device***

Sadayappan Nagamuthu and Kwang-Sun Ryu\*

*Department of Chemistry, University of Ulsan, Muger-dong, Nam-gu, Ulsan 680-749, Republic of Korea*

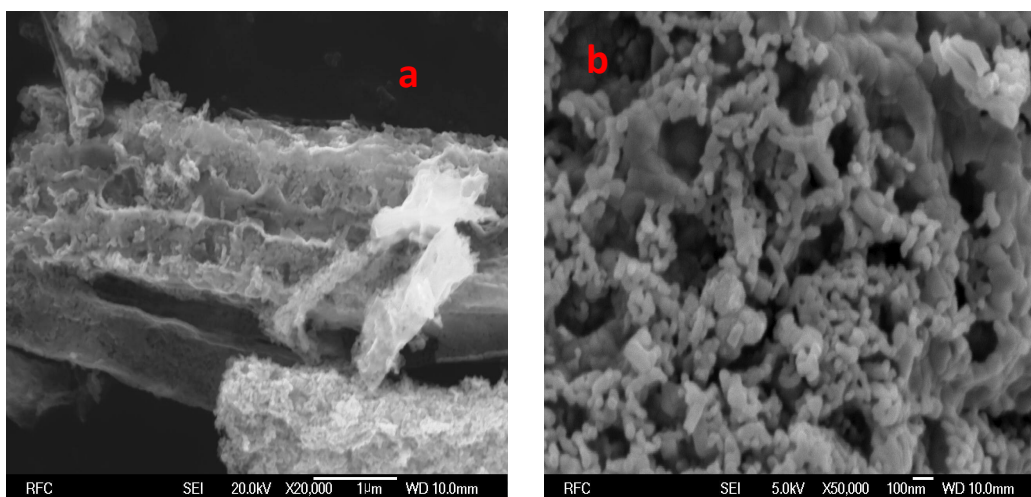

Figure S1: FESEM images of Mn<sub>2</sub>O<sub>3</sub>/C samples calcined at 500°C with the heating rate of 5°C

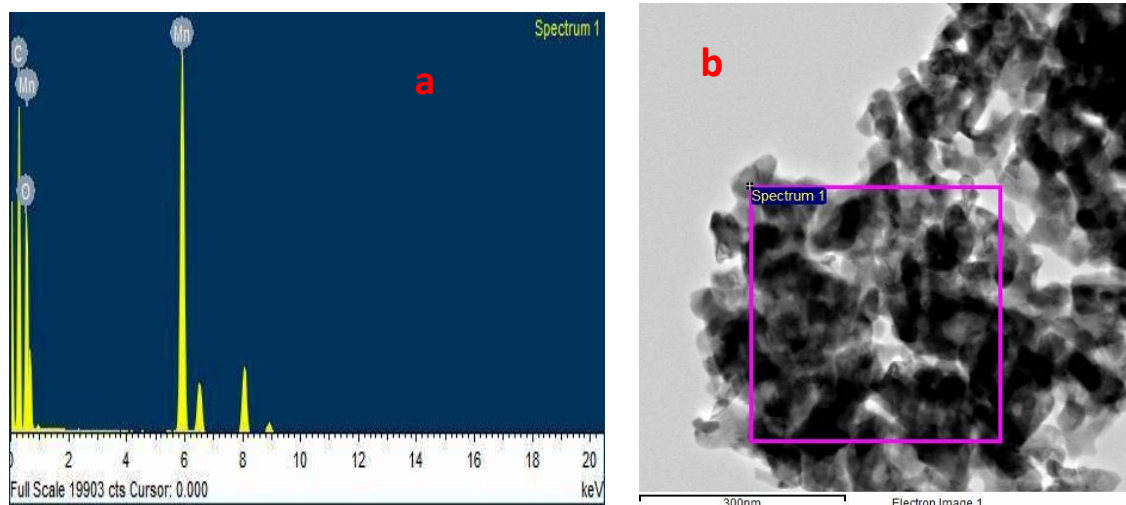

Figure S2: XDAx pattern of  $\text{Mn}_2\text{O}_3/\text{C}$  samples

### Asymmetric supercapacitor device Fabrication:

A coin cell was fabricated using activated carbon as the positive electrode (3.936 mg) and  $\text{Mn}_2\text{O}_3/\text{C}$  as the negative electrode (1 mg). Total mass of the electrode material is 4. 936 mg. Whatman filter paper was used as the separator, which had been presoaked in a 1 M  $\text{Na}_2\text{SO}_4$  electrolyte for 24 h prior to device fabrication.

### Mass balancing for Device fabrication:

The electrode mass ratio should be optimized prior to asymmetric device fabrication

$$\frac{m_+}{m_-} = \frac{C_- \times V_-}{C_+ \times V_+}$$

where  $m_+$  is mass of the positive electrode (activated carbon) (g),  $m_-$  is the mass of the negative electrode (g),  $C_-$  is the specific capacity of the negative electrode ( $\text{C g}^{-1}$ ),  $V_-$  is the potential range of the negative electrode (V),  $C_+$  is the specific capacity of the positive electrode ( $\text{C g}^{-1}$ ), and  $V_+$

is the potential range of the positive electrode (V). The optimal mass ratio is  $\sim 0.18$  is the positive to negative electrodes.

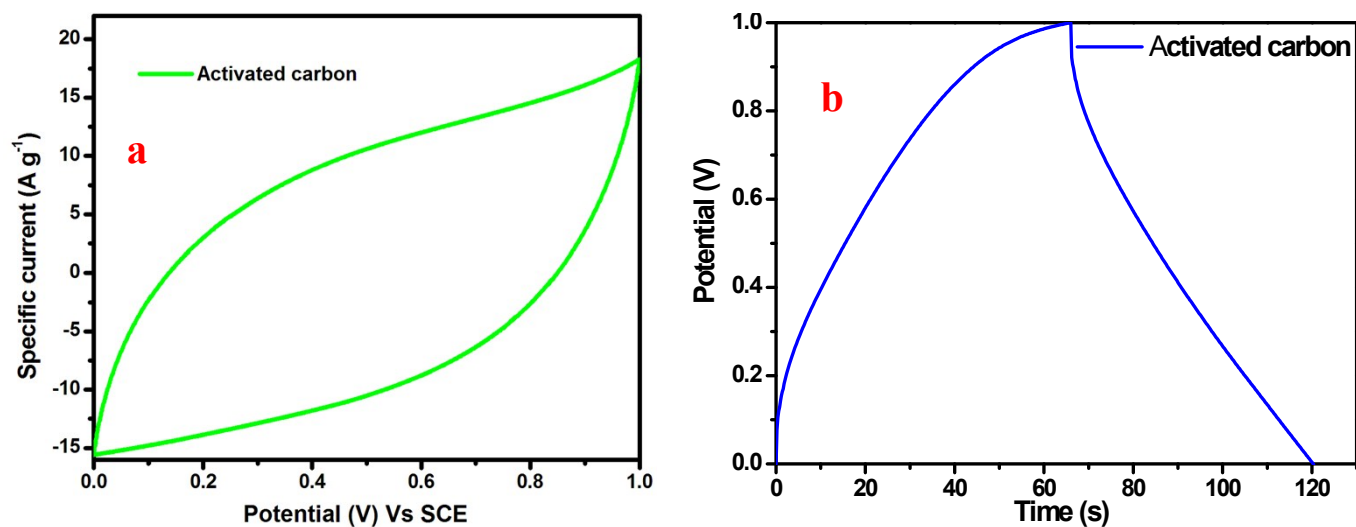

Figure S3: (a) CV curve of activated carbon at  $25\ mVs^{-1}$  and (b) Charge discharge curve of activated carbon electrode at  $2\ A\ g^{-1}$  in aqueous electrolyte

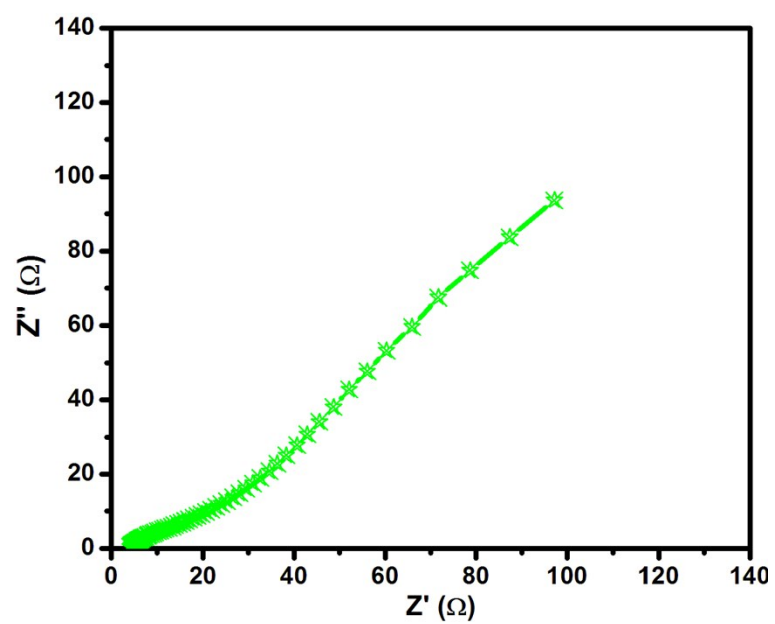

Figure S4: Nyquist plot for asymmetric supercapacitor device after cycling
